# Supplementary material for: Evolutionary dynamics of bacteria in the gut microbiome within and across hosts
Source: PubMed Central journal article supplement (PMC6361464; doi:10.1371/journal.pbio.3000102), 2019-01-23

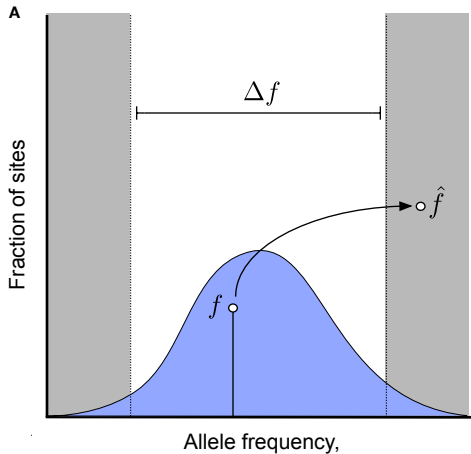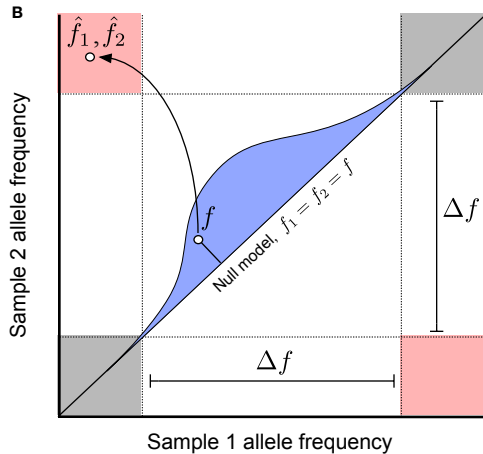

Supplement: pbio.3000102.s004.pdf [file pbio.3000102.s004.pdf]
