# Supplementary material for: Evolutionary dynamics of bacteria in the gut microbiome within and across hosts
Source: PubMed Central journal article supplement (PMC6361464; doi:10.1371/journal.pbio.3000102), 2019-01-23
Supplement: pbio.3000102.s009.pdf [file pbio.3000102.s009.pdf]

Sample A (D=190)

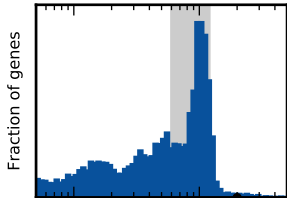

$10^{-1}$   $10^0$   
Estimated gene copynum

Sample B (D=124)

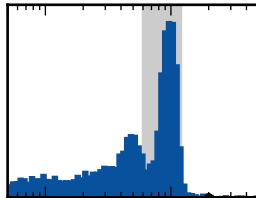

$10^{-1}$   $10^0$   
Estimated gene copynum

Sample C (D=293)

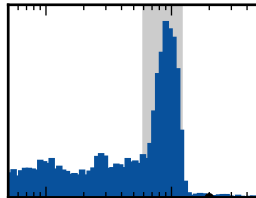

$10^{-1}$   $10^0$   
Estimated gene copynum

Sample D (D=175)

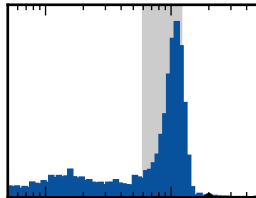

$10^{-1}$   $10^0$   
Estimated gene copynum
