# Supplementary material for: Evolutionary dynamics of bacteria in the gut microbiome within and across hosts
Source: PubMed Central journal article supplement (PMC6361464; doi:10.1371/journal.pbio.3000102), 2019-01-23
Supplement: pbio.3000102.s024.pdf [file pbio.3000102.s024.pdf]

All metagenomic reads from all fecal samples

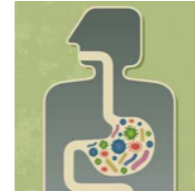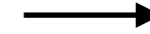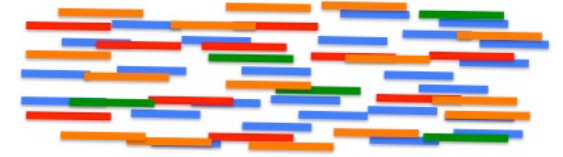

Retain reads that align to reference genomes

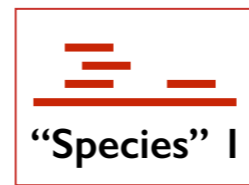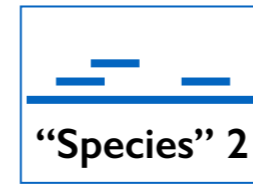

...

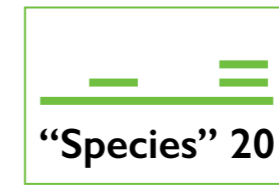

Retain species/sample combos with high coverage

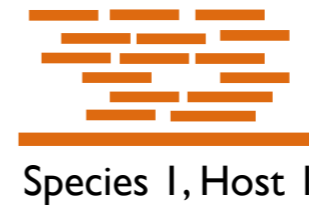

Retain QP species/sample combos

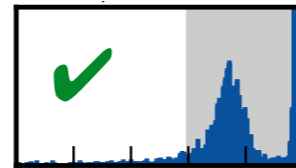

Major allele freq

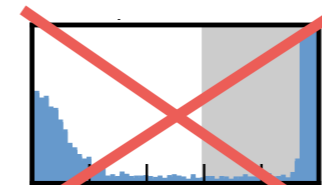

Major allele freq

Restrict to high-confidence part of coding genome and pangenome

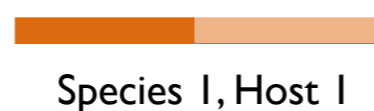

Analyze SNV & gene differences that pass coverage & frequency thresholds

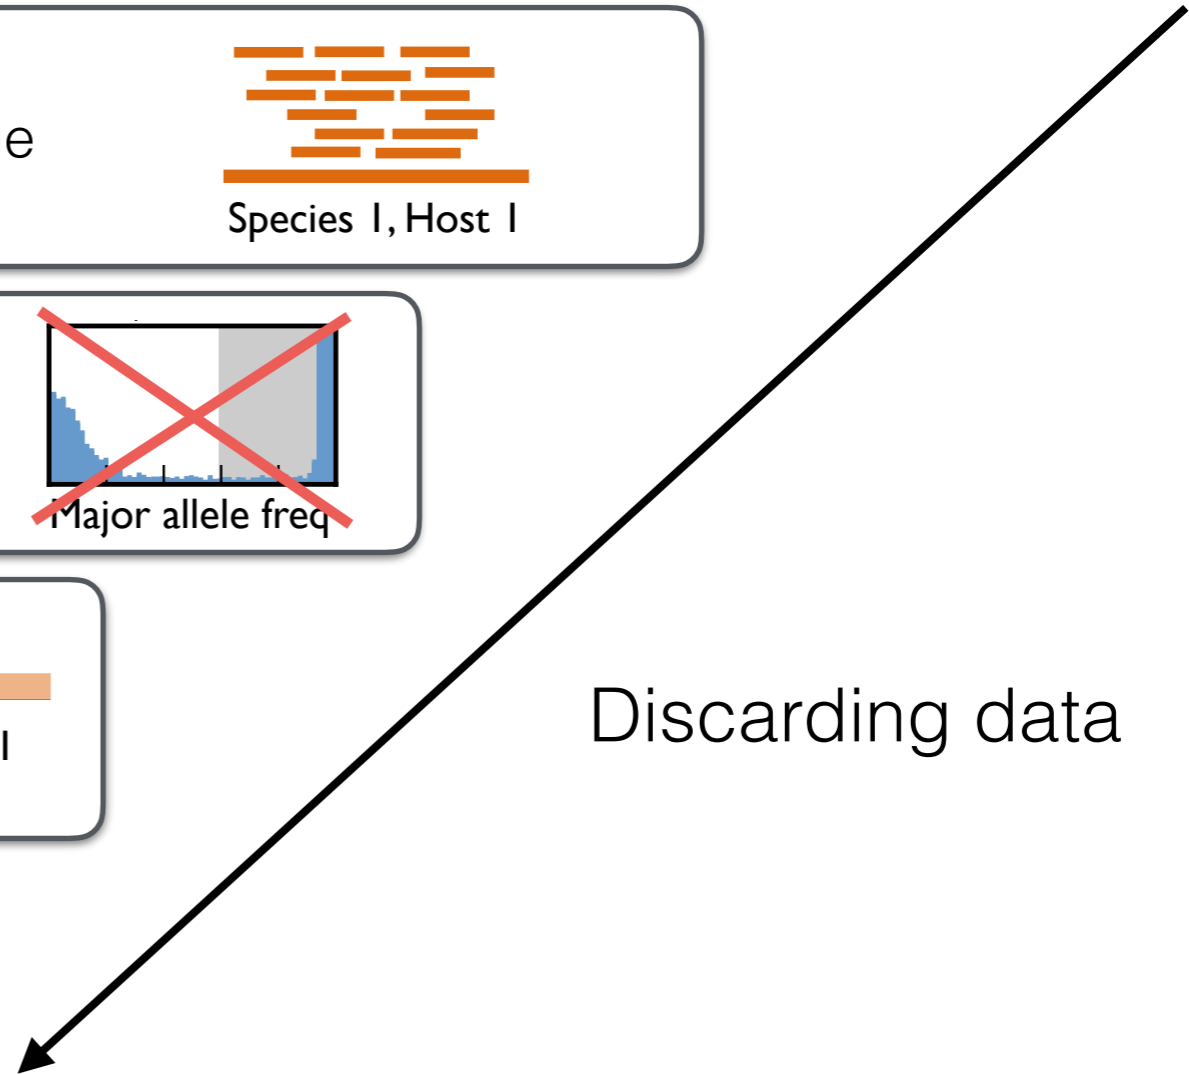

Discarding data
